# Supplementary material for: Active and Passive Smoking, BRAFV600E Mutation Status, and the Risk of Papillary Thyroid Cancer: A Large-Scale Case-Control and Case-Only Study
Source: PubMed Central journal article supplement — Cancer Res Treat. 2019 Feb 20;51(4):1392–9. doi: 10.4143/crt.2018.612 (PMC6790863; doi:10.4143/crt.2018.612), 2019-02-20
Supplement: crt-2018-612-suppl1.pdf [file crt-2018-612-suppl1.pdf]

**S1 Table.** Associations between active smoking and the risk of papillary thyroid cancer stratified by passive smoking exposure status

|                                              | No exposure to passive smoking |                           |                     |                           | Exposure to passive smoking with childhood exposure |                           |                     |                           | Exposure to passive smoking without childhood exposure |                           |                     |                           |
|----------------------------------------------|--------------------------------|---------------------------|---------------------|---------------------------|-----------------------------------------------------|---------------------------|---------------------|---------------------------|--------------------------------------------------------|---------------------------|---------------------|---------------------------|
|                                              | Men <sup>a)</sup>              |                           | Women <sup>a)</sup> |                           | Men <sup>a)</sup>                                   |                           | Women <sup>a)</sup> |                           | Men <sup>a)</sup>                                      |                           | Women <sup>a)</sup> |                           |
|                                              | Cases/Controls                 | OR <sup>b)</sup> (95% CI) | Cases/Controls      | OR <sup>b)</sup> (95% CI) | Cases/Controls                                      | OR <sup>b)</sup> (95% CI) | Cases/Controls      | OR <sup>b)</sup> (95% CI) | Cases/Controls                                         | OR <sup>b)</sup> (95% CI) | Cases/Controls      | OR <sup>b)</sup> (95% CI) |
| <b>Active smoking status</b>                 |                                |                           |                     |                           |                                                     |                           |                     |                           |                                                        |                           |                     |                           |
| Never                                        | 51/474                         | 1.00                      | 728/8,492           | 1.00                      | 15/111                                              | 1.00                      | 238/1,972           | 1.00                      | 63/521                                                 | 1.00                      | 190/1,562           | 1.00                      |
| Past                                         | 90/931                         | 0.78 (0.51-1.19)          | 12/135              | 0.97 (0.51-1.85)          | 27/216                                              | 0.91 (0.30-2.78)          | 4/43                | 1.09 (0.26-4.60)          | 8/65                                                   | 0.76 (0.29-1.98)          | 23/194              | 1.04 (0.68-3.93)          |
| Current                                      | 15/661                         | 0.22 (0.12-0.43)          | 6/210               | 0.31 (0.13-0.73)          | 36/328                                              | 0.92 (0.36-2.39)          | 9/145               | 0.61 (0.22-1.69)          | 11/118                                                 | 0.75 (0.38-1.46)          | 34/355              | 0.80 (0.54-2.30)          |
| <b>Cumulative smoking dose (pack-year)</b>   |                                |                           |                     |                           |                                                     |                           |                     |                           |                                                        |                           |                     |                           |
| Never-smoker                                 | 51/474                         | 1.00                      | 728/8,492           | 1.00                      | 15/111                                              | 1.00                      | 238/1,972           | 1.00                      | 63/521                                                 | 1.00                      | 190/1,562           | 1.00                      |
| <20                                          | 57/849                         | 0.55 (0.35-0.87)          | 12/307              | 0.42 (0.23-0.77)          | 37/290                                              | 1.03 (0.36-2.92)          | 9/166               | 0.66 (0.24-1.79)          | 12/114                                                 | 0.88 (0.46-1.69)          | 35/342              | 0.81 (0.55-2.41)          |
| ≥20                                          | 47/737                         | 0.63 (0.38-1.02)          | 5/36                | 2.31 (0.77-6.96)          | 25/247                                              | 0.85 (0.32-2.26)          | 3/17                | 0.78 (0.12-5.32)          | 7/66                                                   | 0.66 (0.23-1.88)          | 21/198              | 0.92 (0.59-2.93)          |
| <b>Age at active smoking initiation (yr)</b> |                                |                           |                     |                           |                                                     |                           |                     |                           |                                                        |                           |                     |                           |
| Never-smoker                                 | 51/474                         | 1.00                      | 728/8,492           | 1.00                      | 27/27                                               | 1.00                      | 238/1,972           | 1.00                      | 63/521                                                 | 1.00                      | 190/1,562           | 1.00                      |
| ≥25                                          | 7/234                          | 0.26 (0.11-0.61)          | 5/223               | 0.24 (0.09-0.60)          | 5/16                                                | 0.20 (0.05-0.73)          | 9/107               | 0.85 (0.28-2.56)          | 4/44                                                   | 0.62 (0.19-2.05)          | 13/133              | 0.84 (0.48-2.14)          |
| 20-24                                        | 68/977                         | 0.63 (0.41-0.98)          | 11/91               | 1.32 (0.66-2.65)          | 37/67                                               | 0.39 (0.18-0.85)          | 1/63                | 0.31 (0.04-2.49)          | 8/91                                                   | 0.63 (0.26-1.49)          | 23/273              | 0.72 (0.47-1.80)          |
| <20                                          | 29/380                         | 0.63 (0.37-1.08)          | 2/28                | 0.93 (0.20-4.32)          | 21/14                                               | 1.27 (0.49-3.30)          | 3/14                | 2.24 (0.18-27.35)         | 7/47                                                   | 0.98 (0.37-2.57)          | 21/140              | 1.31 (0.82-6.52)          |

OR, odds ratio; CI, confidence interval. <sup>a)</sup>Participants with missing information for passive smoking during growing up (5 cases and 158 controls for men; 17 cases and 474 controls for women) and those with childhood and adulthood exposure to passive smoking (96 cases and 588 controls for men; 438 cases and 4,084 controls for women) were excluded, <sup>b)</sup>Associations between active smoking and thyroid cancer were assessed by conditional logistic regression model (matching variables: age and sex) adjusted for body mass index (< 25 kg/m<sup>2</sup>, ≥ 25 kg/m<sup>2</sup>, and unknown), education (high school graduation: no, yes, and unknown), marital status (single, married, and unknown), and history of chronic diseases (hypertension or dyslipidemia).
